# Supplementary material for: Seed Predation by the Shore Crab Carcinus maenas: A Positive Feedback Preventing Eelgrass Recovery?
Source: PLoS One. 2016 Dec 15;11(12):e0168128. doi: 10.1371/journal.pone.0168128 (PMC5157998; doi:10.1371/journal.pone.0168128)
Supplement: S2 Table — (XLSX) [file pone.0168128.s002.xlsx]

## Sheet: Sheet1
Trial	LABEL	CODE	TREATMENT	Seeds	Art. Seeds	Seed coats	Total Seeds %	Seed loss%	Art. Seed %	Art.Seed loss %	Seed Coat %	Crab length	Crab width	Sex
2	1	C	CAGE	199	13	1	99.5	0.5	65	35	0.5
2	5	C	CAGE	200	15	0	100	0	75	25	0
2	13	C	CAGE	200	20	1	100	0	100	0	0.5
3	1	C	CAGE	119	13	16	59.5	40.5	65	35	8
3	5	C	CAGE	181	15	3	90.5	9.5	75	25	1.5
3	13	C	CAGE	200	12	2	100	0	60	40	1
2	3	CH	CAGE-HAND	90	15	35	45	55	75	25	17.5	2.6	2.1	m
2	9	CH	CAGE-HAND	30	15	23	15	85	75	25	11.5	2.3	1.3	m
2	11	CH	CAGE-HAND	34	17	65	17	83	85	15	32.5	2.9	2.3	f
3	3	CH	CAGE-HAND	10	13	35	5	95	65	35	17.5	3.2	2.5	m
3	9	CH	CAGE-HAND	30	13	40	15	85	65	35	20	3.7	2.6	m
3	11	CH	CAGE-HAND	26	13	17	13	87	65	35	8.5	2.8	2.2	f
2	4	CS	CAGE-SAND	123	16	1	61.5	38.5	80	20	0.5	3.4	2.7	f
2	8	CS	CAGE-SAND	146	13	1	73	27	65	35	0.5	2.4	1.9	f
2	15	CS	CAGE-SAND	122	13	1	61	39	65	35	0.5	3.3	2.6	m
3	4	CS	CAGE-SAND	178	14	3	89	11	70	30	1.5	2.9	2.3	m
3	8	CS	CAGE-SAND	156	14	4	78	22	70	30	2	4.4	3.4	m
3	15	CS	CAGE-SAND	138	12	4	69	31	60	40	2	3.5	2.4	f
2	2	H	HAND	8	11	1	4	96	55	45	0.5
2	7	H	HAND	3	2	1	1.5	98.5	10	90	0.5
2	12	H	HAND	9	6	3	4.5	95.5	30	70	1.5
3	2	H	HAND	7	5	1	3.5	96.5	25	75	0.5
2	7	H	HAND	22	1	0	11	89	5	95	0
3	12	H	HAND	15	3	1	7.5	92.5	15	85	0.5
2	6	S	SAND	2	12	0	1	99	60	40	0
2	10	S	SAND	102	3	0	51	49	15	85	0
2	14	S	SAND	85	6	6	42.5	57.5	30	70	3
3	6	S	SAND	69	2	0	34.5	65.5	10	90	0
3	10	S	SAND	53	2	0	26.5	73.5	10	90	0
3	14	S	SAND	39	2	0	19.5	80.5	10	90	0
